# 1 **Full Title: Preserved global cerebral blood flow accounts for** 2 **youthful processing speed in older adults**

## 3 4 **Short Title: Higher global CBF contributes to successful aging**

5  
6 Fan Nils Yang<sup>1,†</sup>, Long Xie<sup>2,6,†</sup>, Olga Galli<sup>4</sup>, John A. Detre<sup>1,6,7</sup>, David A. Wolk<sup>5,7</sup>,  
7 Hengyi Rao<sup>1,3,7,\*</sup>  
8

9  
10 <sup>1</sup> Center for Functional Neuroimaging, Department of Neurology, University of  
11 Pennsylvania Perelman School of Medicine, Philadelphia, PA, USA.

12 <sup>2</sup> Penn Image Computing and Science Laboratory (PICSL), Department of  
13 Radiology, University of Pennsylvania, Philadelphia, PA, USA.

14 <sup>3</sup> Laboratory of Applied Brain and Cognitive Sciences, Shanghai International  
15 Studies University, Shanghai, China.

16 <sup>4</sup> Department of Psychology, University of Pennsylvania, Philadelphia, PA, USA.

17 <sup>5</sup> Penn Memory Center, University of Pennsylvania, Philadelphia, PA, USA.

18 <sup>6</sup> Department of Radiology, University of Pennsylvania, Philadelphia, PA, USA.

19 <sup>7</sup> Department of Neurology, University of Pennsylvania, Philadelphia, PA, USA.  
20  
21

22 † F.N.Y. and L.X. contributed equally to this work

23 \* Corresponding authors

24 Hengyi Rao, Ph.D.

25 Center for Functional Neuroimaging & Department of Neurology

26 University of Pennsylvania Perelman School of Medicine

27 3W Gates, 3400 Spruce St

28 Philadelphia PA, 19104, USA

29 Phone: 215-746-2470

30 Email: [hengyi@pennteam.upenn.edu](mailto:hengyi@pennteam.upenn.edu)  
31  
32  
33  
34  
35  
36

37

## 38 **Abstract**

39 Preserved cognitive performance is one of the key contributors to successful aging.  
40 The processing speed theory and prefrontal executive theory –are competing  
41 theories regarding the general causes of cognitive aging. Here, we used a  
42 theoretically-driven framework to investigate the neural correlates of older adults  
43 with preserved processing speed. Older adults with youth-like processing speed  
44 (SuperAgers) were compared with normal aged adults (TypicalAgers) using  
45 neuroimaging methods. Global cerebral blood flow (CBF) accounted for  
46 approximately 45% of the variance in processing speed, while neither regional CBF  
47 nor other structural measures predicted additional variance. In addition, despite  
48 having significantly cortical thinning, SuperAgers still shown comparable global  
49 CBF levels with young adults. These results support the global mechanism  
50 suggested by processing speed theory and indicate that global CBF may serve as a  
51 biomarker of cognitive aging.

52

53

## 54 **1. Introduction**

55 The world population is aging at an unprecedented rate (Nations, 2015). Individuals  
56 are living longer and are expected to survive into their 70s and even 80s on average.  
57 Accordingly, it is of utmost socioeconomic importance to promote successful aging  
58 and avoid age-related diseases (Eyler et al., 2011; Harada et al., 2013).

59

60 Cognitive health is a key contributor to successful aging (Depp and Jeste, 2006;  
61 Reichstadt et al., 2007). Cognitive aging refers to a gradual decline in many  
62 cognitive abilities (e.g., memory, attention, executive function and processing  
63 speed) as humans age (Harada et al., 2013). Despite its importance, the underlying  
64 mechanisms of cognitive aging remain obscure.

65

66 Various theories and models have been proposed regarding the mechanisms driving  
67 cognitive aging. The processing speed theory and the prefrontal executive theory  
68 are two competing theories that are among the most influential and empirically  
69 tested accounts of age-related cognitive decline (Albinet et al., 2012). The  
70 processing speed theory proposed by Salthouse in 1996 suggests that age-related  
71 cognitive decline can be accounted for by the *global* mechanism of generalized  
72 slowing of cognitive processing (Salthouse, 1996) (see methods for detailed  
73 definition of processing speed). The generalized slowing has been associated with  
74 reduced global white matter connectivity as indicated by decreased white matter  
75 integrity and increase white matter lesion load (Cabeza et al., 2016). Interestingly,  
76 other global neural measures not directly related to brain connectivity, such as brain  
77 volume and cerebral blood flow (CBF), have also correlated with processing speed  
78 (Rabbitt et al., 2007; Rabbitt et al., 2006). On the other hand, the prefrontal  
79 executive theory states that *local* structural and functional changes in the frontal  
80 cortex lead to a decline in executive function, which in turn produces more general  
81 cognitive deficits (West, 1996). Evidence for each these theories has included work  
82 demonstrating that after controlling for processing speed or executive function, age-  
83 driven differences in high-level cognitive functions are reduced (Anderson et al.,  
84 2010; Deary et al., 2010). In addition, behavioral studies have shown that these two  
85 theories are not mutually exclusive but share some variance (Albinet et al., 2012).  
86 Specifically, executive functions and processing speed each can explain parts of  
87 age-related variance on cognition, and they are not mutual exclusive (Albinet et al.,  
88 2012).

89  
90 Examining the neural correlates of older individuals with preserved cognitive  
91 functions relative to young adults, i.e. SuperAgers, has been suggested as a  
92 promising way to investigate successful cognitive aging and could potentially guide  
93 the search for means to improve cognitive decline in older adults (Depp and Jeste,  
94 2006; Eyler et al., 2011; Sun et al., 2016). In this study, we used functional and

95 structural neuroimaging to examine cerebral blood flow, whole brain volume, and  
96 cortical thickness in cognitively normal older adults stratified into typical agers  
97 (TypicalAgers) and “super” agers (SuperAgers) based on their performance on a  
98 simple and well-validated measure of processing speed, i.e. the psychomotor  
99 vigilance test (PVT).

100

101 It has been well documented that in older adults, big brain-structure size is usually  
102 associated with better cognitive performance, especially for frontal regions and  
103 executive functions (see Kaup et al. (2011) for a review). Similarly, augmented  
104 brain response/activation in frontal regions might serve as a compensatory  
105 mechanism in older adults (see Eyler et al. (2011) for a review). However, as Eyler  
106 et al. (2011) mentioned, “a simple model of bigger structure → greater brain  
107 response → better cognitive performance might not be accurate”. Here we further  
108 investigate the potentially different roles of brain structure and function on  
109 persevered cognitive function on SuperAgers.

110

111 Taken together, the processing speed theory suggested reduced processing speed in  
112 TypicalAgers will be associated primarily with global brain measures, such as  
113 global CBF or mean cortical thickness of whole brain, while prefrontal executive  
114 theory posits that reduction in processing speed will be associated primarily with  
115 focal (prefrontal) measures. Alternatively, since these theories are not mutually  
116 exclusive, it is also possible that focal and global brain measures each account for  
117 unique variance in processing speed. In addition to these theories, previous studies  
118 indicated that SuperAgers will likely have bigger brain structure (i.e. thicker gray  
119 matter) and greater brain response (i.e. higher CBF during task) than TypicalAgers.  
120 More evidences are in need to reveal the underlying mechanism of the “SuperAger  
121 phenomenon”.

122

123 The current work aim to test these competing hypotheses by investigating both  
124 global and focal neural correlates of processing speed in a group of older  
125 cognitively normal adults (OG, N = 32). Processing speed was accessed as the  
126 mean reaction time (RT) when permorming a well-validated simple reaction time  
127 task, i.e. psychomotor vigilance test (PVT) (Basner et al., 2017). Global and  
128 regional structural (cortical thickness) and functional (cerebral blood flow (CBF)  
129 during performing the PVT task and at rest) neural measurements were extracted  
130 from the T1-weighted MRI and arterial spin labeled perfusion MRI (ASL MRI)  
131 scans of each subject respectively. In addition, a group of young controls (YC, N =  
132 39) was included in this study serving as a reference group to define cut-off to  
133 stratify OG into SuperAgers (N = 15) and TypicalAgers (N = 17) (details described  
134 in Section 4.2 and briefly summarized in Figure 1A) as well as to derive data-driven  
135 regions of interest (ROI), shown in Figure 1B, to extract local measurements  
136 (described in Section 4.4.3). The effect of global and local measurements was  
137 compared in terms of discriminating SuperAgers from TypicalAgers as well as  
138 predicting processing speed of the older adults (the OG group).

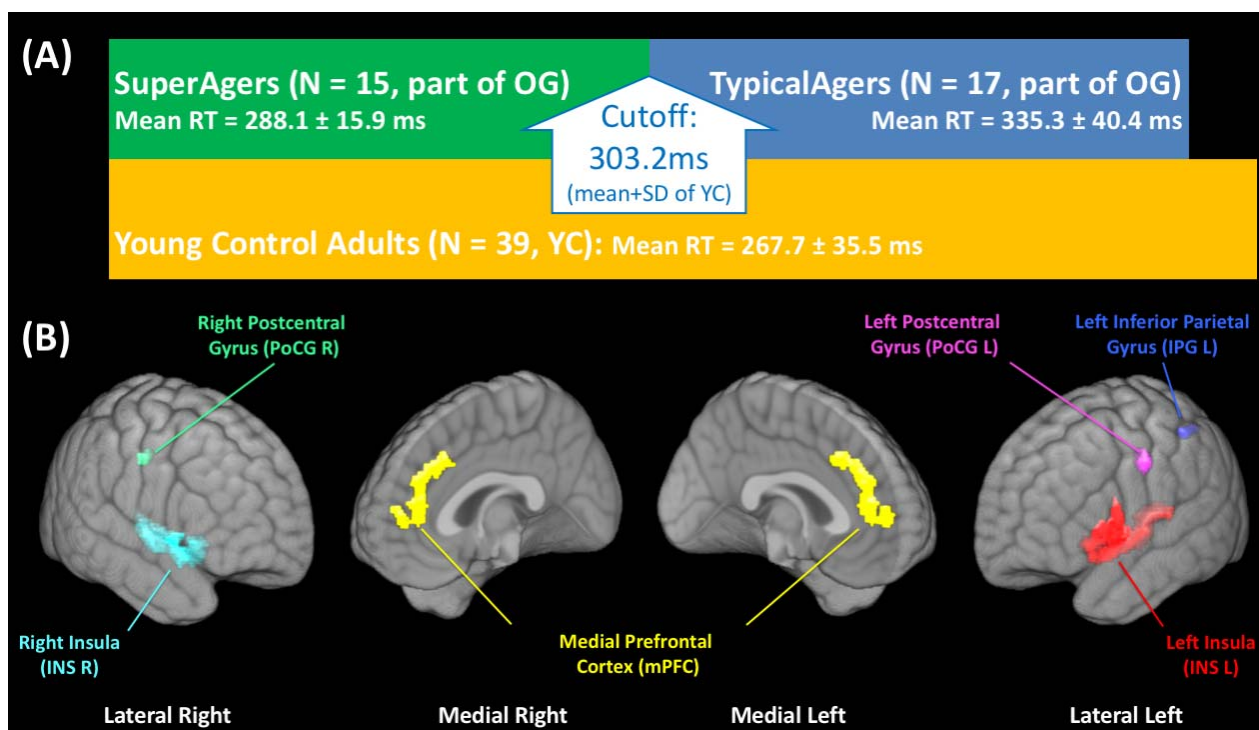

**Figure 1.** (A) Block diagram showing the assignment of young control (YC), SuperAgers and TypicalAgers. (B) Data driven regions of interest (ROI) in this study. The ROIs were defined in a data-driven manner representing regions with both significant perfusion and structural differences between young controls and older cognitively normal controls (both SuperAgers and TypicalAgers) to locate regions associated with both functional and structural changes due to aging. OG = older cognitive normal adult group, SD = standard deviation.

## 2. Results

### 2.1 Demographic data

The characteristics of YC, TypicalAgers and SuperAgers are shown in Table 1. TypicalAgers and SuperAgers did not differ in sex, age and education. There was no significant difference in Mini-Mental State Examination (MMSE) performance between TypicalAgers and SuperAgers. As expected, there was no significant difference in mean reaction time (RT) between SuperAgers and YC.

**Table 1.** Demographics, MMSE and mean PVT reaction time of young controls, TypicalAgers and SuperAgers.

|                | Young Control (YC) | TypicalAgers (TA) | SuperAgers (SA) | Global Stats                      | Cohen's d Between Groups |           |           |
|----------------|--------------------|-------------------|-----------------|-----------------------------------|--------------------------|-----------|-----------|
|                |                    |                   |                 |                                   | YC vs. TA                | YC vs. SA | SA vs. TA |
| N              | 39                 | 17                | 15              |                                   |                          |           |           |
| Sex (% female) | 46.2%              | 64.7%             | 60.0%           | $\chi^2 = 2.0$<br>$p > 0.1$       |                          |           |           |
| Education      | 15.2 (2.1)         | 16.9 (2.5)        | 15.4 (3.7)      | $F(2,68)=2.9$<br>$p = 0.06$       | -0.81                    | -0.09     | -0.50     |
| Age            | 32.7 (7.8)         | 71.9 (6.0)        | 66.9 (8.3)      | $F(2,68)=214.3$<br>$p < 10^{-29}$ | 5.41***                  | 4.29***   | -0.70     |

|         |              |              |              |                                 |         |       |         |
|---------|--------------|--------------|--------------|---------------------------------|---------|-------|---------|
| MMSE    | -            | 29.4 (0.8)   | 28.9 (1.3)   | $t(30)=0.3$<br>$p > 0.1$        | -       | -     | -0.40   |
| Mean RT | 267.7 (35.5) | 335.3 (40.4) | 288.1 (15.9) | $F(2,68)=23.7$<br>$p < 10^{-7}$ | 1.83*** | -0.63 | 1.52*** |

Note: Mean (standard deviation). \*, \*\*\* denote  $p < 0.05$ ,  $p < 0.001$ , respectively (Bonferroni corrected). PVT = psychomotor vigilance test, MMSE = mini-mental state examination, RT = reaction time.

## 2.2 Discriminating SuperAgers and TypicalAgers

To investigate potential global effects, the whole-brain mean resting CBF, whole-brain task CBF, whole brain mean cortical thickness, cortical gray matter and white matter volume of each subject were extracted. Analysis of covariance (ANCOVA) covaried for age, sex and education revealed significant group differences in functional and structural global measurements in the three groups (Table 2), including differences in whole-brain CBF during PVT task ( $F(2,68) = 21.4$ ,  $p < 10^{-7}$ ) and at rest ( $F(2,68) = 18.5$ ,  $p < 10^{-6}$ ), mean cortical thickness ( $F(2,68) = 100.9$ ,  $p < 10^{-20}$ ), as well as cortical gray matter volume ( $F(2,68) = 85.8$ ,  $p < 10^{-18}$ ). Post-hoc analyses results, reported in Table 2, demonstrated that the major differences between SuperAgers and TypicalAgers were found in whole-brain task and rest CBF (all  $p < 0.001$  corrected with large Cohen's  $d$ ). Also, SuperAgers had significantly more cortical gray matter than TypicalAgers ( $p < 0.05$  corrected with relatively small Cohen's  $d$ ). It is also worth noting that no differences in whole-brain task or rest CBF were found between YC and SuperAgers (all  $p > 0.05$ ), while this was not the case between YC and TypicalAgers (all  $p < 0.001$  corrected).

In addition to global measurements, the mean resting CBF, task CBF and cortical thickness of each ROI shown in Figure 1B were extracted as local measurements. Significant group differences, tested by ANCOVA accounting for age, sex, and education, between SuperAgers and TypicalAgers were seen in CBF measurements during the PVT task and at rest (see Figure 2). Midline structures in the frontal lobe,

189 (i.e. mPFC) exhibited group differences at a trend level in cortical thickness ( $t(30) =$   
 190 3.2,  $p = 0.003$ ,  $p > 0.05$  after correction).

191

192 To further illustrate the differences between the three groups, bar plots of each of  
 193 the regional or global functional and structural measurements for each of the three  
 194 groups without adjustment for covariates are shown in Supplementary Figure S3 in  
 195 Supplement C. Qualitatively, we observed that regional resting and task CBF in  
 196 SuperAgers were more similar to YC compared to that of the TypicalAgers.  
 197 However, the amount of cortical thinning of both SuperAgers and TypicalAgers is  
 198 similarly significantly lower than YC. This may indicate that, compared to Typical  
 199 Agers, brain function of SuperAgers (as reflected by CBF measures) is more  
 200 preserved even in the context of similar cortical atrophy relatively young adults.

201

202

203 **Table 2.** Global and structural measurements of Young Controls, TypicalAgers and  
 204 SuperAgers.

|                                                     | Young Control (YC) | Typical Agers (TA) | Super Agers (SA) | ANOVA Global Stats                | Cohen's d Between Groups |                |                |
|-----------------------------------------------------|--------------------|--------------------|------------------|-----------------------------------|--------------------------|----------------|----------------|
|                                                     |                    |                    |                  |                                   | YC vs. TA                | YC vs. SA      | SA vs. TA      |
| N                                                   | 39                 | 17                 | 15               |                                   |                          |                |                |
| Whole-Brain Task CBF (ml/100g tissue/min)           | 63.8 (12.9)        | 42.2 (9.5)         | 56.3 (8.4)       | $F(2,68)=21.4$<br>$p < 10^{-7}$   | <b>1.80***</b>           | 0.62           | <b>1.58***</b> |
| Whole-Brain Resting CBF (ml/100g tissue/min)        | 62.9 (13.6)        | 42.1 (9.7)         | 56.6 (8.0)       | $F(2,68)=18.5$<br>$p < 10^{-6}$   | <b>1.66***</b>           | 0.51           | <b>1.62***</b> |
| Cortical Gray Matter Volume (1000 mm <sup>3</sup> ) | 551.4 (21.6)       | 467.4 (29.1)       | 492.0 (22.6)     | $F(2,68)=85.8$<br>$p < 10^{-18}$  | <b>3.49***</b>           | <b>2.71***</b> | <b>0.94*</b>   |
| White Matter Volume (1000 mm <sup>3</sup> )         | 451.1 (15.2)       | 442.0 (24.4)       | 447.2 (14.2)     | $F(2,68)=1.6$<br>$p > 0.1$        | 0.27                     | 0.44           | 0.26           |
| Mean Cortical Thickness (mm)                        | 2.18 (0.15)        | 1.69 (0.07)        | 1.79 (0.14)      | $F(2,68)=100.9$<br>$p < 10^{-20}$ | <b>3.81***</b>           | <b>2.66***</b> | 0.93           |

205 Note: Mean (standard deviation). \*, \*\*\* denote  $p < 0.05$ ,  $p < 0.001$ , respectively (Bonferroni corrected). CBF =  
 206 cerebral blood flow.

207

208



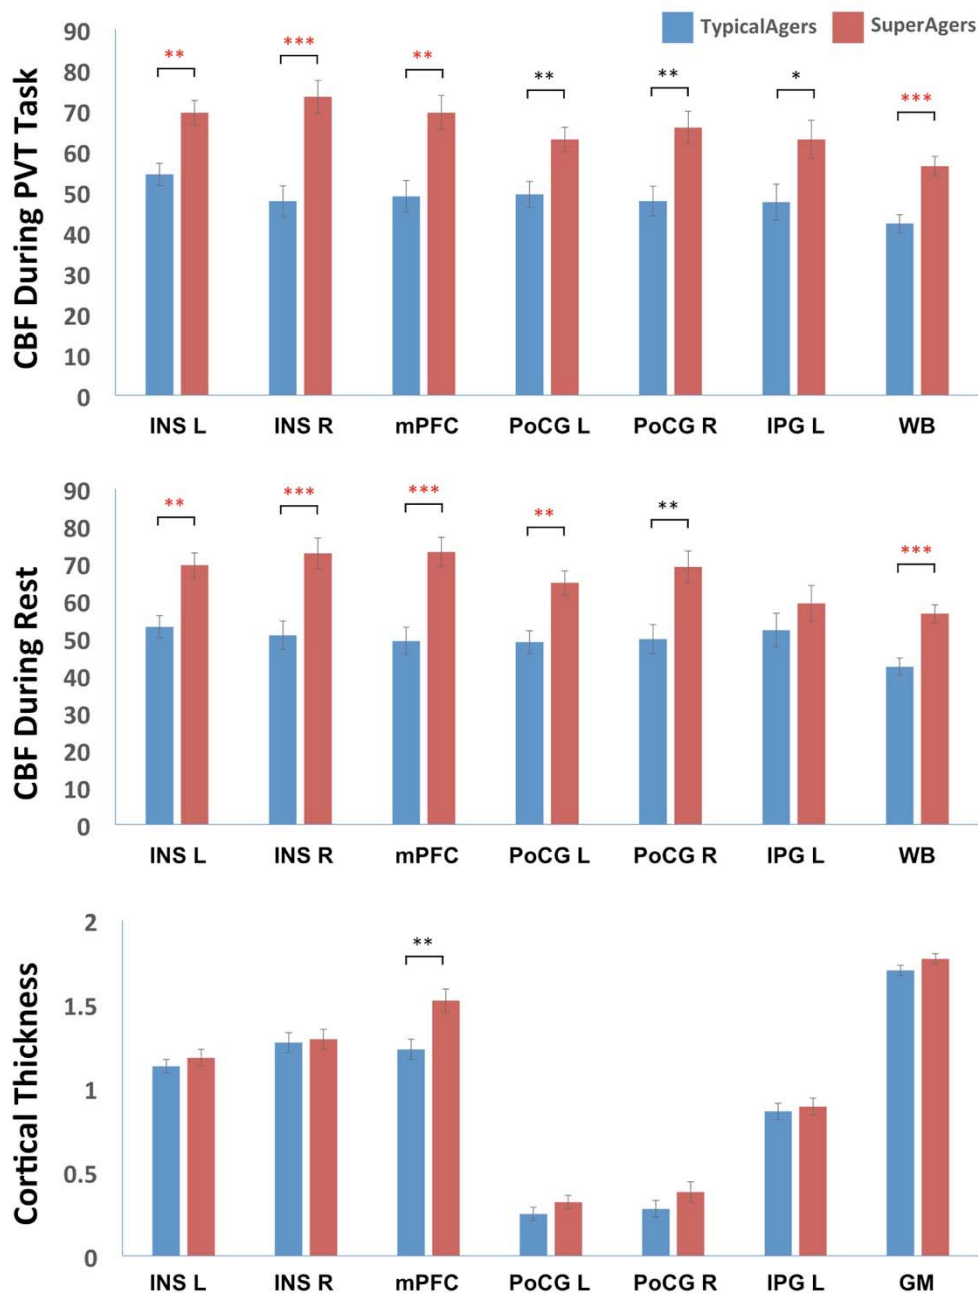

**Figure 2.** Regional and global cerebral blood flow (CBF) and cortical thickness measurements, adjusted for age, sex and education. Abbreviations: INS = insula, mPFC = medial prefrontal cortex, PoCG = postcentral gyrus, IPG = inferior parietal gyrus, WB = whole brain, GM = gray matter, L = left, R = right. \*, \*\*, \*\*\* denote  $p < 0.05$ ,  $p < 0.01$ ,  $p < 0.001$ , respectively. Red stars indicate  $p$  values survived Bonferroni corrections ( $p < 0.05/21$ ).

220 **Table 3.** Partial Pearson correlations between global and ROI-based functional and  
 221 structural measurements and mean PVT reaction time, with age, sex and education  
 222 as covariates.

| Regions of Interest | Task CBF              | Resting CBF          | Thickness |
|---------------------|-----------------------|----------------------|-----------|
| INS L               | -0.70*** <sup>1</sup> | -0.47* <sup>2</sup>  | -0.02     |
| INS R               | -0.60*** <sup>1</sup> | -0.42* <sup>2</sup>  | -0.17     |
| mPFC                | -0.52** <sup>1</sup>  | -0.51** <sup>2</sup> | -0.30     |
| PoCG L              | -0.56** <sup>1</sup>  | -0.55** <sup>2</sup> | -0.26     |
| PoCG R              | -0.52** <sup>1</sup>  | -0.49* <sup>2</sup>  | -0.20     |
| IPG L               | -0.53** <sup>1</sup>  | -0.47* <sup>2</sup>  | -0.01     |
| Global              | -0.71***              | -0.63***             | -0.13     |

223 Note: \*, \*\*, \*\*\* denote  $p < 0.05$ ,  $p < 0.01$ ,  $p < 0.001$ , respectively; red stars indicate  $p$  values survived Bonferroni  
 224 corrections ( $p < 0.05/21$ ). CBF = cerebral blood flow, INS = insula, mPFC = medial prefrontal cortex, PoCG =  
 225 postcentral gyrus, IPG = inferior parietal gyrus, L = left, R = right.

226 <sup>1</sup> not significant after controlling whole-brain CBF during psychomotor vigilance test task

227 <sup>2</sup> not significant after controlling whole-brain CBF at rest

228

229

### 230 **2.3 Correlations between CBF and mean reaction time**

231 CBF during the PVT task and at rest were significantly correlated with mean RT  
 232 (Table 3). However, none of these correlations remained significant when including  
 233 the corresponding global measurement (i.e global measure of task CBF, rest CBF  
 234 and thickness for ROI-based task CBF, rest CBF and thickness measures  
 235 respectively) as a covariate. Figure 3 shows a scatter plot of age, sex and education-  
 236 adjusted mean RT and global CBF during the PVT task, which was the most  
 237 predictive measurement for processing speed ( $r = 0.71$ ,  $p < 0.001$ ). Cortical  
 238 thickness measures in ROIs and total cortical gray matter were not predictive of  
 239 mean RT. The two-step hierarchical linear regression further demonstrated that only  
 240 whole-brain task CBF ( $\beta = -2.5$ ,  $R^2$  change = 0.451,  $p < 0.001$ ) was included in the  
 241 most predictive model ( $N = 32$ ,  $F = 7.5$ ,  $R^2 = 0.526$ ,  $p < 0.001$ ). Structural  
 242 measurements provided no additional information.

243 Voxel-wise partial correlation analyses between resting and task CBF and mean RT  
244 (Supplement D) demonstrated that both resting and task CBF across a majority of  
245 brain regions is significantly correlated with mean RT (Supplementary Figure S4).

246

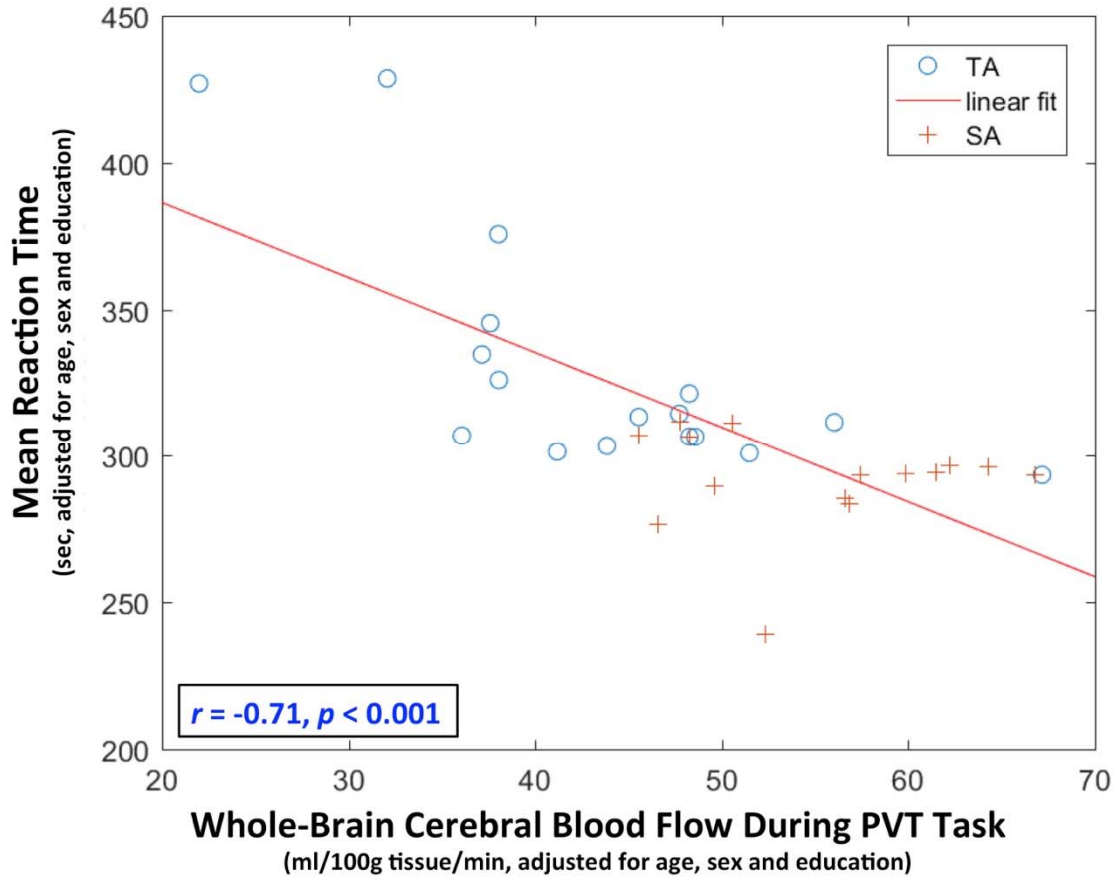

247

248 **Figure 3.** Scatter plot of the whole-brain cerebral blood flow during the  
249 psychomotor vigilance test (PVT) and mean reaction time, adjusted for age, sex and  
250 education, of TypicalAgers (TA) and SuperAgers (SA).

251

252

253

254

255

### 256 3. Discussion

257 The principal purpose here was to examine the neural correlates of persevered  
258 processing speed in SuperAgers. The present findings demonstrate that preserved  
259 processing speed in SuperAgers is associated with global CBF both at rest and more  
260 so during PVT task performance, rather than with regional CBF. SuperAgers

261 showed global rest and task CBF values that were not significantly different from  
262 young controls, despite having significantly thinner cortical thickness and lower  
263 regional CBF in frontal regions. This effect was observed even after controlling for  
264 demographic factors such as age, gender, and education, as well as other brain  
265 measurements such as whole brain volume and cortical thickness.

### 267 **3.1 The definition of SuperAgers**

268 Previously, the term SuperAgers has been used to refer to older adults with youthful  
269 memory abilities at normative performance for young adults on delayed free recall  
270 tests (Gefen et al., 2014; Harrison et al., 2017; Sun et al., 2016). We extended the  
271 definition to older adults that have a comparable performance with young adults on  
272 a simple reaction time task because some studies have shown that when controlling  
273 for processing speed, age differences in memory may be largely reduced or even  
274 eliminated (Bryan and Luszcz, 1996; Lee et al., 2012). Furthermore, processing  
275 speed is thought to be one of the behavioral measures most sensitive to age (Cabeza  
276 et al., 2016).

### 278 **3.2 Global CBF, but not regional CBF, correlated with processing 279 speed in older adults**

280 Although previous studies have shown that total resting CBF is positively  
281 correlated with processing speed in older adults (Poels et al., 2008; Rabbitt et al.,  
282 2007; Rabbitt et al., 2006), this relationship has not been well-understood. For  
283 example, by using phase-contrast MRI, these studies did not assess regional CBF. It  
284 is possible that the use of total CBF masked regional relationships, as Steffener et  
285 al. (2013) showed that distributed regional CBF correlated with processing speed  
286 measures in older adults. The current study extended previous studies by  
287 demonstrating that the correlation between regional CBF and processing speed in  
288 older adults might be fully driven by the global CBF. In addition, the global CBF  
289 during task explained more variance in processing speed as compared to the global

290 resting CBF, suggesting that task CBF might be more sensitive to the processing  
291 speed in older adults and should be considered as one biomarker for processing  
292 speed in the future. This notion is in line with previous studies, which demonstrated  
293 that task-state CBF may be more associated with cognitive decline (Xie et al., 2018;  
294 Xie et al., 2016).

295  
296 The fact that global, but not regional CBF accounted for the processing speed in  
297 older adults provides an additional neural evident for the processing speed theory.  
298 According to this theory, degraded cognitive functions in old age is due to the  
299 global mechanism of the slowed processing speed, which limits the ability to  
300 simultaneously process a certain amount of information needed for higher level  
301 cognitive functions (Salthouse, 1996). This generalized slowing is associated with  
302 the decreased efficiency of interregional communication, which might be caused by  
303 decreased white matter integrity (Cabeza et al., 2016). Indeed, decreased white  
304 matter integrity of the whole brain is associated with this generalized slowing  
305 (Cabeza et al., 2016; Gunning - Dixon et al., 2009; Penke et al., 2010). The current  
306 study extended this notion to the CBF. Recent studies have shown that there is a  
307 significant relationship between CBF and white matter integrity (Brickman et al.,  
308 2009; Chen et al., 2013). It is possible that global CBF and white matter integrity of  
309 whole brain both plays an important role on supporting the efficiency of  
310 interregional communication throughout the brain. Future studies should determine  
311 whether CBF and white matter integrity account for unique portions of variance in  
312 processing speed. Another possible explanation regarding this CBF-speed  
313 association is that as CBF is tightly coupled with brain metabolism (Raichle, 1998),  
314 reduced global CBF and brain metabolism likely reflect global neuronal  
315 dysfunction. Therefore, reduced CBF is leading to less efficient brain and decreased  
316 processing speed. This hypothesis needs to be tested in future studies.

### **3.3 Neither functional or structural changes in specific regions (e.g. frontal lobe) accounted for processing speed in older adults**

The rationale for prefrontal executive theory is as follow, 1) executive functions are a set of high-order functions that are necessary for the cognitive control and coordination of fundamental cognitive operations, 2) the frontal lobe is a key region for executive functions, 3) both executive functions and the frontal lobe are extremely sensitive to the effects of normal aging (Phillips and Henry, 2008). Consistent with this rationale, both large age-related CBF reductions and cortical thinning was were found in prefrontal regions and bilateral insula in both groups of older adults. In addition, large CBF and cortical thickness difference in medial prefrontal cortices were found between SuperAgers and TypicalAgers, suggesting the executive function might be different between these two groups as well. Nonetheless, neither thickness within medial prefrontal cortex nor other cortical thickness measurement were correlated with processing speed.

In contrast to previous studies showing that CBF and brain volume each account for unique variance in processing speed (Rabbitt et al., 2007; Rabbitt et al., 2006; Steffener et al., 2013), or that brain volume mediates the association between CBF and processing speed (Poels et al., 2008), the present study found no significant differences between SuperAgers and TypicalAgers in white matter volume, and relatively small difference in gray matter volume. One possible explanation is that age itself has a large effect on CBF, brain volume, processing speed, and other brain measures (see Cabeza et al. (2016) for a review). This possible confound was minimized by focusing on comparisons between SuperAgers and age-matched TypicalAgers. Step-wise regression results further confirmed that global task related CBF was the only significant predictor of PVT performance in older individuals, accounting for 45.1% of the variance in mean response time.

346 Taken together, although regional structural and functional differences were found  
347 between SuperAgers and TypicalAgers, it is the global functional measure CBF that  
348 explained the most variance in processing speed. In addition, as indicated in  
349 Supplementary Figure S3, it is surprising that with similar amount of significant  
350 cortical thinning as TypicalAgers (much lower compared to young adults),  
351 SuperAgers are able to preserve youth-like processing speed and to maintain  
352 youthful global CBF. These results provide further evidence that a simplified model  
353 of “bigger brain structure, better cognitive performance” may not be sufficient in  
354 explaining successful cognitive aging (Eyler et al., 2011). Instead, the robust  
355 relationship between global CBF and processing speed suggested that global CBF  
356 might be considered as a potential biomarker for successful cognitive aging.

### 358 **3.4 Limitations**

359 There are several limitations to this study. First, as we did not directly test executive  
360 function in the current study, it is possible that executive functions were not  
361 different between SuperAgers and TypicalAgers, and hence here the focal regions  
362 did not contribute to the processing speed difference between the two groups.  
363 However, previous studies have shown that the majority of the age-related variance  
364 in executive functions is shared with processing speed (Albinet et al., 2012; Luszcz,  
365 2011). In addition, substantial differences were found in prefrontal regions, in terms  
366 of both cortical thickness and CBF measures, between these two groups, suggesting  
367 executive functions differences might be also differ between SuperAgers and  
368 TypicalAgers. Second, it remains an open question whether the SuperAgers in the  
369 present sample were also top performers in their youth. Based on our results, it is  
370 possible that young adults with higher processing speed performance were resilient  
371 against age-related CBF decline and remained top performers as they aged.  
372 Longitudinal studies are still needed to test this possibility. Third, the current study  
373 used only one processing speed measure, which raises a question of whether these  
374 results are task-specific. Salthouse (2000) found that all six speed measurements

375 using different tasks, including reaction time, are highly intercorrelated and that  
376 age-related effects on an individual speed measure can be largely explained by  
377 other speed measures. Thus, it is likely that our results can be repeated by using  
378 other measures of processing speed.

### 380 **3.5 Future directions**

381 Future studies may utilize larger datasets to investigate the relationship between  
382 global CBF and age-related decline in a broader range of cognitive domains.  
383 Interestingly, a recent study found that global CBF can predict older adults' general  
384 cognitive function 4 years later (De Vis et al., 2018). This finding further supports  
385 our conclusion that global CBF may serve as a biomarker of processing speed, and  
386 therefore as a biomarker of cognitive aging (as suggested by the processing speed  
387 theory).

388  
389 Previous studies have shown that slowed reaction times are associated with an  
390 elevated risk of future cognitive disorders (Cherbuin et al., 2010; Kochan et al.,  
391 2016). Given the robust relationship between global CBF and reaction time, future  
392 studies may wish to examine whether reduced global CBF is one of several key  
393 predictors of transition from healthy aging to dementia. Further investigation of the  
394 neural mechanisms underlying the SuperAger phenomenon may allow us to design  
395 effective interventions to promote successful aging.

## 399 **4. Methods and materials**

### 400 **4.1 Study design**

401 The current study is an observational study. Data from eighty-three healthy adults  
402 aggregated across two different study cohorts are included in the analyses. Forty-  
403 three young adults (21-50 years old) comprised the young control group (YC).



404 These subjects were recruited in response to study advertisements, as part of a sleep  
405 deprivation study (Fang et al., 2015). The remaining 40 subjects (57-85 years old),  
406 referred to as the older cognitively normal group (OG), were recruited from the  
407 Penn Memory Center as part of a study of prodromal Alzheimer's disease (Xie et  
408 al., 2016). All subjects had no history of clinical stroke, significant traumatic brain  
409 injury, alcohol or drug abuse/dependence, or any other medical or psychiatric  
410 condition thought to significantly impact cognition. The study was approved by the  
411 Institutional Review Board of the University of Pennsylvania.

## 413 **4.2 Processing speed task: psychomotor vigilance Test**

414 By definition, processing speed refers to the speed of motor responses and the speed  
415 with which cognitive operations can be executed (Harada et al., 2013; Salthouse,  
416 1996). Processing speed tends to be affected earlier in lifespan, as compared to  
417 other cognitive abilities, like episodic memory, reasoning, and spatial ability  
418 (Hedden and Gabrieli, 2004; Salthouse, 1996; Schaie, 1996).

419  
420 Here, a well-validated simple reaction time task, PVT, was used. PVT has been  
421 shown to be highly reliable, free of learning/practice effect, and uncontaminated by  
422 aptitude (Basner et al., 2017), making it suitable for assessing processing speed in  
423 older populations. During the PVT, participants are instructed to maintain their  
424 attention on a red-outlined rectangular area located in the center of a dark screen  
425 and to respond (button press) as fast as they can whenever a yellow millisecond  
426 counter appears inside the rectangle. The millisecond counter stops after  
427 participants' action and remains for another one second to allow participants to see  
428 their reaction time (RT). Button presses when the millisecond counter did not  
429 appear are counted as false alarms, whereas failure to respond within 30 seconds  
430 leads to a time out. Participants are instructed to respond as quickly as possible  
431 while maintaining accuracy. The PVT was administered during arterial spin labeled  
432 perfusion MRI (ASL MRI) scanning. The reaction time measures, excluding those

433 from time out trials, were averaged to compute mean RT for each subject, which  
434 serves as a measure of the subject's processing speed.

435  
436 The OG group was divided into TypicalAgers and SuperAgers based on their mean  
437 RT during the PVT. The cutoff was determined as one standard deviation above the  
438 mean (slower responses) of the YC group, which was 303.2 milliseconds. OG  
439 individuals with a mean RT within one standard deviation of the young control  
440 group were categorized as SuperAgers, while those with a mean RT greater than  
441 303.2ms were categorized as TypicalAgers. The group assignment was summarized  
442 in Figure 1A.

### 443 444 **4.3 MRI acquisition**

445 All imaging was performed on a 3T Siemens Trio MRI scanner (Erlangen,  
446 Germany) equipped with either a product eight-channel or thirty-two-channel array  
447 coil. The scans of YC and OG were acquired following two similar protocols. In  
448 both protocols, high-resolution structural images were acquired with 3D-MPRAGE  
449 (Mugler III and Brookeman, 1990) at 1 mm<sup>3</sup> isotropic resolution (TI = 950 ms, TE  
450 = 3 ms, TR = 1620 ms). In addition, a pseudocontinuous ASL (pCASL) (Dai et al.,  
451 2008) with a 2D gradient-echo echo planar imaging (GR-EPI) readout was used in  
452 both protocols to measure regional cerebral blood flow (CBF). All participants were  
453 scanned during a 'resting' and a 'task' sequence.

454  
455 Acquisition parameters for the pCASL sequence in the protocol for OG were:  
456 TR/TE/FA = 4 s/19 ms/ 90°, 6 mm slice thickness, 1 mm inter-slice gap, 18 slices  
457 acquired in ascending order, 3.5 × 3.5 × 7 mm<sup>3</sup> resolution. Arterial spin labeling  
458 was implemented with mean Gz of 0.6 mT/m and 1640 Hanning window shaped  
459 RF pulses for a total labeling duration of 1.5 seconds. The labeling plane was  
460 positioned 80 or 90 mm below the center of the imaging region and post-labeling  
461 delay was set to 1.5 seconds. The 'resting' and 'task' sequences lasted ~6 min with

462 45 pairs of label-control scans for signal averaging. Due to technical issues or  
463 subject fatigue, only 37 pairs of ‘task’ scan for one subject were acquired, but data  
464 quality was sufficient for inclusion in the analyses.

465  
466 The pCASL sequence in the protocol for YC differed from that of the OG in the  
467 following aspects: (1) The post-labeling delay of the arterial spin labeling was set to  
468 1.0 second to account for reduced transit time in YC; (2) Due to a change of  
469 protocol during the study, the ASL data was acquired in two slice thickness: either  
470 4.8 mm (30 slices) or 6 mm (20 slices); (3) 30 pairs of label-control scans were  
471 acquired for the ‘resting’ sequence; (4) the ‘task’ sequence acquired 75 pairs of  
472 scans. Due to potential subject fatigue during ‘task’ ASL MRI (Lim et al., 2010),  
473 different task durations may introduce bias. To avoid this, the ‘task’ sequence of the  
474 YC was truncated and only the first 45 pairs of scans were analyzed. This was not  
475 necessary for the ‘resting’ CBF measurement.

## 477 **4.3 Neuroimaging data processing**

### 478 **4.3.1 Tissue segmentation and CBF quantification**

479 Statistical Parametric Mapping 8 (SPM 8, Wellcome Department of Cognitive  
480 Neurology, UK) and ASLtbx (a SPM add-on toolbox) were used to perform tissue  
481 segmentation and to quantify regional cerebral blood flow (CBF) from the ASL  
482 MRI scans, including the following steps: (1) realignment and averaging of ASL  
483 time series to correct for head motion and to generate a mean EPI image, (2) rigid  
484 registration of the mean EPI image to the anatomical image, (3) transformation of  
485 each frame of the ASL time series using the image generated in the previous step  
486 followed by smoothing in space with a 3-dimensional 4 mm full width at half  
487 maximum (FWHM) Gaussian kernel, (4) tissue segmentation of the structural  
488 image using the pipeline in SPM8 to generate gray matter (GM), white matter  
489 (WM) and cerebrospinal fluid (CSF) probability maps, which are then smoothed  
490 using a 3-dimensional FWHM Gaussian kernel and resampled to the space of the

491 registered mean EPI image, (5) generation of perfusion-weighted time series using  
492 pairwise subtraction of the label and control images, (6) application of the modified  
493 single compartment continuous ASL perfusion model (Wang et al., 2003) to the  
494 perfusion-weighted time series to derive an absolute CBF image series, (7)  
495 application of the Structural Correlation-based Outlier Rejection (SCORE) (Dolui  
496 et al., 2017) to the CBF image series to perform denoising and generate a “cleaned”  
497 CBF image, (8) adjustment of the CBF signal at each voxel of the “cleaned” CBF  
498 image by dividing with the GM probability plus 0.4 times WM probability at the  
499 corresponding voxel to correct for partial volume effect (results did not change  
500 without partial volume effect, see Supplement A), (9) normalization to the  $2 \times 2 \times 2$   
501  $\text{mm}^3$  Montreal Neurological Institute (MNI) template using the DARTEL algorithm  
502 (Ashburner, 2007).

#### 504 **4.3.2 Cortical thickness map estimation**

505 A diffeomorphic registration based cortical thickness analysis pipeline (Das et al.,  
506 2009) available in Advanced Normalization Tools (ANTs) was applied to the  
507 structural MRI scan of each subject to derive a voxel-wise cortical thickness map.  
508 The thickness maps were smoothed using a 4 mm FWHM Gaussian kernel and  
509 normalized to the MNI space ( $1 \times 1 \times 1 \text{ mm}^3$ ).

#### 511 **4.3.3 Quality control**

512 Quality control was performed by visual inspection. Subjects with CBF maps with  
513 extensive non-physiological negative or positive CBF clusters (likely caused by  
514 instability of spin labeling, subject motion, or MRI artifacts) were identified and  
515 excluded from the study. The SPM DARTEL pipeline failed on one individual in  
516 the older adult group. In total, data for four YC and four OG subjects were  
517 excluded. In addition, the four oldest TypicalAgers were excluded to generate an  
518 age-matched sample with the SuperAgers, yielding 39 YC, 15 SuperAgers and 17  
519 TypicalAgers (i.e. 32 OG) for the final analysis.

520

521

## 522 **4.4 Statistical analysis**

523 Statistical analyses were performed using standard methods in SPSS 23.0 (Chicago,  
524 IL), MATLAB 2014a (Math Works, Natick, MA) and FSL 5.0.5. All statistical  
525 analyses are two-tailed.

526

### 527 **4.4.1 Analysis of demographic data**

528 Contingency  $\chi^2$  testing, and analysis of variance (ANOVA) with post-hoc  
529 comparisons were used to test group differences among YC, TypicalAgers and  
530 SuperAgers. Bonferroni correction was applied to adjust for multiple comparisons.

531

### 532 **4.4.2 Analysis of global measurements**

533 To investigate potential global effects, the whole-brain mean resting CBF, whole-  
534 brain task CBF, whole brain mean cortical thickness, cortical gray matter and white  
535 matter volume of each subject were extracted. ANOVA analysis with post-hoc  
536 comparisons and Bonferroni correction was used to investigate group differences  
537 and perform pairwise group comparisons between YC, TypicalAgers and  
538 SuperAgers.

539

### 540 **4.4.3 Analysis of local measurements**

541 A region of interest (ROI) analysis was also used to analyze neuroimaging  
542 measurements. The ROIs were defined in a data-driven manner representing regions  
543 with both significant perfusion and structural differences between YC and OG to  
544 locate regions associated with both functional and structural changes due to aging.  
545 Voxel-wise independent two sample t-tests were performed using the normalized  
546 resting CBF maps and thickness maps separately using the “Randomize” package  
547 (Winkler et al., 2014), with family-wise error rate (FWE) correction for multiple  
548 comparisons. As cortical thickness was only defined in cortex, the analysis for the

549 thickness maps was limited to voxels with cortical thickness greater than 0.1mm in  
550 all the subjects. Regions with corrected  $p \leq 0.001$  in both analyses were defined as  
551 ROIs. Individual statistical maps of resting CBF and cortical thickness together  
552 with the ROIs are shown in Supplement B. ROIs with cluster sizes smaller than 320  
553 mm<sup>3</sup> (corresponding to 40 voxels in the 2x2x2 mm<sup>3</sup> MNI template) were excluded.  
554 In total, six ROIs were generated (Figure 1B), and included the bilateral insula (INS  
555 L/R), bilateral postcentral gyrus (PoCG L/R), medial portion of the prefrontal gyrus  
556 (mPFC), and left inferior parietal gyrus (IPG L). In each ROI, mean resting CBF,  
557 task CBF, and cortical thickness were extracted for each subject.

558  
559 For each global or ROI-based measurement, an analysis of covariance (ANCOVA),  
560 with age, sex, and education as covariates was performed to examine the difference  
561 between TypicalAgers and SuperAgers. Within TypicalAgers and SuperAgers,  
562 ROI-based partial linear correlation analyses controlling for age, sex and education,  
563 was performed between mean RT and neuronal measurements. Bonferroni  
564 correction was applied to correct for multiple comparisons. To investigate whether  
565 measurements of the regional ROIs provide additional predictive value beyond the  
566 global measurements, the partial correlation analysis was repeated with the  
567 corresponding global measurement as an additional covariate.

#### 568 569 **4.4.4 Hierarchical linear regression analysis for functional and structural** 570 **measurements**

571 To further investigate whether structural measurements provide complementary  
572 information in predicting mean RT, a two-step, hierarchical linear regression was  
573 performed with age, sex, and education entered in the first step, and with whole-  
574 brain task and resting CBF and structural measurements, including ROI-based and  
575 whole-brain mean cortical thickness, gray matter volume, and white matter volume  
576 in the second step.

578

579

## References

580

Albinet, C.T., Boucard, G., Bouquet, C.A., Audiffren, M., 2012. Processing speed and executive functions in cognitive aging: how to disentangle their mutual relationship? *Brain Cogn* 79, 1-11.

581

582

583

Anderson, V., Jacobs, R., Anderson, P.J., 2010. Executive functions and the frontal lobes: A lifespan perspective. Psychology Press.

584

585

Ashburner, J., 2007. A fast diffeomorphic image registration algorithm.

586

*Neuroimage* 38, 95-113.

587

Basner, M., Hermosillo, E., Nasrini, J., McGuire, S., Saxena, S., Moore, T.M., Gur, R.C., Dinges, D.F., 2017. Repeated Administration Effects on Psychomotor Vigilance Test Performance. *Sleep* 41, zsx187.

588

589

590

Brickman, A.M., Zahra, A., Muraskin, J., Steffener, J., Holland, C.M., Habeck, C., Borogovac, A., Ramos, M.A., Brown, T.R., Asllani, I., 2009. Reduction in cerebral blood flow in areas appearing as white matter hyperintensities on magnetic resonance imaging. *Psychiatry Research: Neuroimaging* 172, 117-120.

591

592

593

594

595

Bryan, J., Luszcz, M., 1996. Speed of information processing as a mediator between age and free-recall performance. *Psychology and aging* 11, 3.

596

597

Cabeza, R., Nyberg, L., Park, D.C., 2016. Cognitive neuroscience of aging: Linking cognitive and cerebral aging. Oxford University Press.

598

599

Chen, J.J., Rosas, H.D., Salat, D.H., 2013. The relationship between cortical blood flow and sub-cortical white-matter health across the adult age span. *PLoS One* 8, e56733.

600

601

602

Cherbuin, N., Sachdev, P., Anstey, K.J., 2010. Neuropsychological Predictors of Transition From Healthy Cognitive Aging to Mild Cognitive Impairment: The PATH Through Life Study. *The American Journal of Geriatric Psychiatry* 18, 723-733.

603

604

605

606

Dai, W., Garcia, D., De Bazelaire, C., Alsop, D.C., 2008. Continuous flow-driven inversion for arterial spin labeling using pulsed radio frequency and gradient fields. *Magnetic Resonance in Medicine: An Official Journal of the International Society for Magnetic Resonance in Medicine* 60, 1488-1497.

607

608

609

610

Das, S.R., Avants, B.B., Grossman, M., Gee, J.C., 2009. Registration based cortical thickness measurement. *Neuroimage* 45, 867-879.

611

612

De Vis, J.B., Peng, S.L., Chen, X., Li, Y., Liu, P., Sur, S., Rodrigue, K.M., Park, D.C., Lu, H., 2018. Arterial-spin-labeling (ASL) perfusion MRI predicts cognitive function in elderly individuals: A 4-year longitudinal study. *J Magn*

613

614

- 515 Reson Imaging 48, 449-458.
- 516 Deary, I.J., Johnson, W., Starr, J.M., 2010. Are processing speed tasks biomarkers  
517 of cognitive aging? *Psychol Aging* 25, 219-228.
- 518 Depp, C.A., Jeste, D.V., 2006. Definitions and predictors of successful aging: a  
519 comprehensive review of larger quantitative studies. *The American Journal of*  
520 *Geriatric Psychiatry* 14, 6-20.
- 521 Dolui, S., Wang, Z., Shinohara, R.T., Wolk, D.A., Detre, J.A., Initiative, A.s.D.N.,  
522 2017. Structural Correlation-based Outlier Rejection (SCORE) algorithm for  
523 arterial spin labeling time series. *Journal of Magnetic Resonance Imaging* 45,  
524 1786-1797.
- 525 Eyler, L.T., Sherzai, A., Kaup, A.R., Jeste, D.V., 2011. A review of functional brain  
526 imaging correlates of successful cognitive aging. *Biol Psychiatry* 70, 115-122.
- 527 Fang, Z., Spaeth, A.M., Ma, N., Zhu, S., Hu, S., Goel, N., Detre, J.A., Dinges, D.F.,  
528 Rao, H., 2015. Altered salience network connectivity predicts macronutrient  
529 intake after sleep deprivation. *Sci Rep* 5, 8215.
- 530 Gefen, T., Shaw, E., Whitney, K., Martersteck, A., Stratton, J., Rademaker, A.,  
531 Weintraub, S., Mesulam, M.M., Rogalski, E., 2014. Longitudinal  
532 neuropsychological performance of cognitive SuperAgers. *J Am Geriatr Soc*  
533 62, 1598-1600.
- 534 Gunning-Dixon, F.M., Brickman, A.M., Cheng, J.C., Alexopoulos, G.S., 2009.  
535 Aging of cerebral white matter: a review of MRI findings. *International Journal of*  
536 *Geriatric Psychiatry: A journal of the psychiatry of late life and allied*  
537 *sciences* 24, 109-117.
- 538 Harada, C.N., Love, M.C.N., Triebel, K.L., 2013. Normal cognitive aging. *Clinics*  
539 *in geriatric medicine* 29, 737-752.
- 540 Harrison, T.M., Lockhart, S.N., Baker, S.L., Jagust, W.J., 2017. The Role of  $\beta$ -  
541 Amyloid in Superagers with Superior Memory Performance and Preserved  
542 Brain Morphometry. *Alzheimer's & Dementia* 13, P1463-P1464.
- 543 Hedden, T., Gabrieli, J.D., 2004. Insights into the ageing mind: a view from  
544 cognitive neuroscience. *Nat Rev Neurosci* 5, 87-96.
- 545 Kaup, A.R., Mirzakhani, H., Jeste, D.V., Eyler, L.T., 2011. A review of the brain  
546 structure correlates of successful cognitive aging. *J Neuropsychiatry Clin*  
547 *Neurosci* 23, 6-15.
- 548 Kochan, N.A., Bunce, D., Pont, S., Crawford, J.D., Brodaty, H., Sachdev, P.S.,  
549 2016. Reaction Time Measures Predict Incident Dementia in Community-  
550 Living Older Adults: The Sydney Memory and Ageing Study. *Am J Geriatr*  
551 *Psychiatry* 24, 221-231.
- 552 Lee, T., Crawford, J.D., Henry, J.D., Trollor, J.N., Kochan, N.A., Wright, M.J.,



- 553 Ames, D., Brodaty, H., Sachdev, P.S., 2012. Mediating effects of processing  
554 speed and executive functions in age-related differences in episodic memory  
555 performance: a cross-validation study. *Neuropsychology* 26, 776-784.
- 556 Luszcz, M., 2011. Executive function and cognitive aging. *Handbook of the*  
557 *Psychology of Aging (Seventh Edition)*. Elsevier, pp. 59-72.
- 558 Mugler III, J.P., Brookeman, J.R., 1990. Three-dimensional  
559 magnetization-prepared rapid gradient-echo imaging (3D MP RAGE).  
560 *Magnetic Resonance in Medicine* 15, 152-157.
- 561 Nations, U., 2015. World population prospects: The 2015 revision. *United Nations*  
562 *Econ Soc Aff* 33, 1-66.
- 563 Penke, L., Munoz Maniega, S., Murray, C., Gow, A.J., Hernandez, M.C., Clayden,  
564 J.D., Starr, J.M., Wardlaw, J.M., Bastin, M.E., Deary, I.J., 2010. A general  
565 factor of brain white matter integrity predicts information processing speed in  
566 healthy older people. *J Neurosci* 30, 7569-7574.
- 567 Phillips, L.H., Henry, J.D., 2008. Adult aging and executive functioning. *Executive*  
568 *functions and the frontal lobes: A lifespan perspective*, 57-79.
- 569 Poels, M.M., Ikram, M.A., Vernooij, M.W., Krestin, G.P., Hofman, A., Niessen,  
570 W.J., van der Lugt, A., Breteler, M.M., 2008. Total cerebral blood flow in  
571 relation to cognitive function: the Rotterdam Scan Study. *J Cereb Blood Flow*  
572 *Metab* 28, 1652-1655.
- 573 Rabbitt, P., Mogapi, O., Scott, M., Thacker, N., Lowe, C., Horan, M., Pendleton,  
574 N., Jackson, A., Lunn, D., 2007. Effects of global atrophy, white matter lesions,  
575 and cerebral blood flow on age-related changes in speed, memory, intelligence,  
576 vocabulary, and frontal function. *Neuropsychology* 21, 684.
- 577 Rabbitt, P., Scott, M., Thacker, N., Lowe, C., Jackson, A., Horan, M., Pendleton,  
578 N., 2006. Losses in gross brain volume and cerebral blood flow account for  
579 age-related differences in speed but not in fluid intelligence. *Neuropsychology*  
580 20, 549.
- 581 Raichle, M.E., 1998. Behind the scenes of functional brain imaging: a historical and  
582 physiological perspective. *Proceedings of the National Academy of Sciences*  
583 95, 765-772.
- 584 Reichstadt, J., Depp, C.A., Palinkas, L.A., Jeste, D.V., 2007. Building blocks of  
585 successful aging: a focus group study of older adults' perceived contributors to  
586 successful aging. *The American Journal of Geriatric Psychiatry* 15, 194-201.
- 587 Salthouse, T.A., 1996. The processing-speed theory of adult age differences in  
588 cognition. *Psychol Rev* 103, 403-428.
- 589 Salthouse, T.A., 2000. Aging and measures of processing speed. *Biological*  
590 *psychology* 54, 35-54.

- 591 Schaie, K.W., 1996. Intellectual development in adulthood: The Seattle longitudinal  
592 study. Cambridge University Press.
- 593 Smith SM, Nichols TE. 2009. Threshold-free cluster enhancement: addressing  
594 problems of smoothing, threshold dependence and localisation in cluster  
595 inference. *Neuroimage* 44:83–98.
- 596 Steffener, J., Brickman, A.M., Habeck, C.G., Salthouse, T.A., Stern, Y., 2013.  
597 Cerebral blood flow and gray matter volume covariance patterns of cognition in  
598 aging. *Hum Brain Mapp* 34, 3267-3279.
- 599 Sun, F.W., Stepanovic, M.R., Andreano, J., Barrett, L.F., Touroutoglou, A.,  
700 Dickerson, B.C., 2016. Youthful Brains in Older Adults: Preserved  
701 Neuroanatomy in the Default Mode and Salience Networks Contributes to  
702 Youthful Memory in Superaging. *J Neurosci* 36, 9659-9668.
- 703 Wang, J., Alsop, D.C., Song, H.K., Maldjian, J.A., Tang, K., Salvucci, A.E., Detre,  
704 J.A., 2003. Arterial transit time imaging with flow encoding arterial spin  
705 tagging (FEAST). *Magnetic Resonance in Medicine: An Official Journal of the*  
706 *International Society for Magnetic Resonance in Medicine* 50, 599-607.
- 707 West, R.L., 1996. An application of prefrontal cortex function theory to cognitive  
708 aging. *Psychological Bulletin* 120, 272.
- 709 Winkler, A.M., Ridgway, G.R., Webster, M.A., Smith, S.M., Nichols, T.E., 2014.  
710 Permutation inference for the general linear model. *Neuroimage* 92, 381-397.
- 711 Xie, L., Das, S.R., Paliana, A., Daffner, M., Stockbower, G.E., Dolui, S.,  
712 Yushkevich, P.A., Detre, J.A., Wolk, D.A., 2018. Task-enhanced arterial spin  
713 labeled perfusion MRI predicts longitudinal neurodegeneration in mild  
714 cognitive impairment. *Hippocampus*.
- 715 Xie, L., Dolui, S., Das, S.R., Stockbower, G.E., Daffner, M., Rao, H., Yushkevich,  
716 P.A., Detre, J.A., Wolk, D.A., 2016. A brain stress test: Cerebral perfusion  
717 during memory encoding in mild cognitive impairment. *Neuroimage Clin* 11,  
718 388-397.

## 722 **Acknowledgments**

### 723 **Funding:**

724 This work was supported by National Institutes of Health (Grant numbers R01-  
725 AG037376, R01-EB017255, R01-AG040271, P30-AG010124, K23-AG028018,  
726 P41-EB015893).

727

## 728 **Author contributions:**

729 Study concept and design: R.H., D.A.W., J.A.D.

730 Data analysis: F.N.Y., L.X.

731 Drafting manuscript: F.N.Y., L.X., O.G.

732 Approval of the final version of the manuscript: All authors.

## 734 **Competing interests:**

735 Dr. D.A.W. received grants from Eli Lilly/Avid Radiopharmaceuticals, personal

736 fees from Eli Lilly, grants and personal fees from Merck, grants from Biogen,

737 personal fees from Janssen, and personal fees from GE Healthcare.

## 741 **Figures and Tables**

## 746 **Supplementary Materials**

### 747 **A. Statistical analysis results using CBF measurements without** 748 **corrected for partial volume effect.**

749  
750 All of the statistical analyses were repeated using CBF measurements without  
751 correction for a partial volume effect. The results, shown in Table S1, Table S2, and  
752 Figure S1 are similar to those with partial volume correction. Similarly, the two-  
753 step, hierarchical linear regression using the uncorrected CBF measurements  
754 generated similar results with only whole-brain task CBF ( $\beta = -3.1$ ,  $R^2$  change =  
755 0.457,  $p < 0.001$ ) selected in the most predictive model ( $N = 32$ ,  $F = 7.7$ ,  $R^2 =$   
756 0.532,  $p < 0.001$ ).

757  
758  
759 **Table S1.** Global functional measurements in Young Control, TypicalAgers and  
760 SuperAgers without correction for partial volume effect.

|  | Young<br>Control<br>(YC) | Typical<br>Agers<br>(TA) | Super<br>Agers<br>(SA) | Cohen's d Between Groups |           |           |
|--|--------------------------|--------------------------|------------------------|--------------------------|-----------|-----------|
|  |                          |                          |                        | YC vs. TA                | YC vs. SA | SA vs. TA |

| N                                                                                     | 39             | 17         | 15         |                |      |                |
|---------------------------------------------------------------------------------------|----------------|------------|------------|----------------|------|----------------|
| Whole-Brain Task CBF<br>(without Partial Volume<br>Correction, ml/100g tissue/min)    | 52.5<br>(10.7) | 35.4 (7.8) | 47.1 (6.9) | <b>1.72***</b> | 0.62 | <b>1.59***</b> |
| Whole-Brain Resting CBF<br>(without Partial Volume<br>Correction, ml/100g tissue/min) | 51.7<br>(11.2) | 35.2 (8.0) | 47.3 (6.7) | <b>1.59***</b> | 0.51 | <b>1.62***</b> |

Note: Mean (standard deviation). \*, \*\*\*, denote  $p < 0.05$ ,  $p < 0.001$ , respectively (Bonferroni corrected).

**Table S2.** Partial Pearson correlations between global and ROI-based functional measurements without correction for partial volume effect and mean reaction time, with age, sex and education as covariates.

| Regions of Interest | Task CBF              | Resting CBF          |
|---------------------|-----------------------|----------------------|
| INS L               | -0.69*** <sup>1</sup> | -0.46* <sup>2</sup>  |
| INS R               | -0.62*** <sup>1</sup> | -0.40* <sup>2</sup>  |
| mPFC                | -0.51** <sup>1</sup>  | -0.52** <sup>2</sup> |
| PoCG L              | -0.59** <sup>1</sup>  | -0.55** <sup>2</sup> |
| PoCG R              | -0.55** <sup>1</sup>  | -0.52* <sup>2</sup>  |
| IPG L               | -0.60** <sup>1</sup>  | -0.51* <sup>2</sup>  |
| Global              | -0.72***              | -0.63***             |

Note: \*, \*\*, \*\*\* denote  $p < 0.05$ ,  $p < 0.01$ ,  $p < 0.001$ , respectively; red stars show  $p$  values survived Bonferroni corrections ( $p < 0.05/21$ ). CBF = cerebral blood flow, INS = insula, mPFC = medial prefrontal cortex, PoCG = postcentral gyrus, IPG = inferior parietal gyrus, L = left, R = right.

<sup>1</sup> not significant after controlling whole-brain CBF during psychomotor vigilance test task

<sup>2</sup> not significant after controlling whole-brain CBF at rest

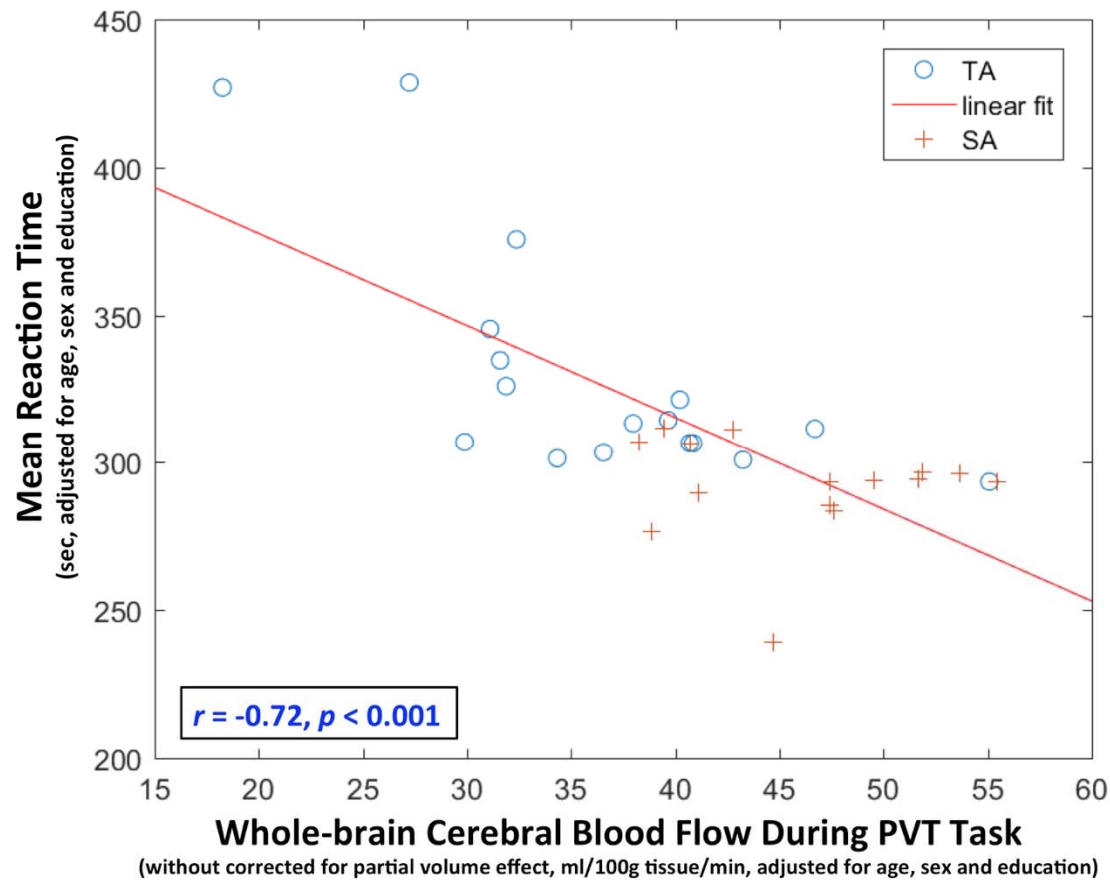

775

776 **Figure S1.** Scatter plot of whole-brain cerebral blood flow during the Psychomotor  
777 Vigilance Test (PVT) without correction for partial volume effect and the mean  
778 reaction time, adjusted for age, sex and education, of TypicalAgers (TA) and  
779 SuperAgers (SA).

780

781

## 782 **B. Statistical maps of cortical thickness and resting CBF differences** 783 **between young and older controls**

784 Data-driven regions of interest (ROI) were defined as the regions that exhibit  
785 significant age-related differences in cortical thickness and resting CBF between  
786 young and older controls. Voxel-wise independent two sample t-tests were  
787 performed on the normalized resting CBF maps and cortical thickness maps  
788 separately, between young and older subjects using the Randomise package  
789 (Winkler, Ridgway, Webster, Smith, & Nichols, 2014). Family-wise error rate  
790 (FWE) was applied to correct for multiple comparisons. A significance level of  
791 corrected  $p \leq 0.001$  is used. As cortical thickness is only defined in cortex, the

792 analysis for the thickness maps was limited to voxels with thickness greater than  
793 0.1mm for all the subjects. The statistical maps for cortical thickness and resting  
794 CBF are shown in Figures S2-A and Figure S2-B, respectively. The union regions  
795 were defined as ROIs for this study (Figure 1B and Figure S2-C).  
796

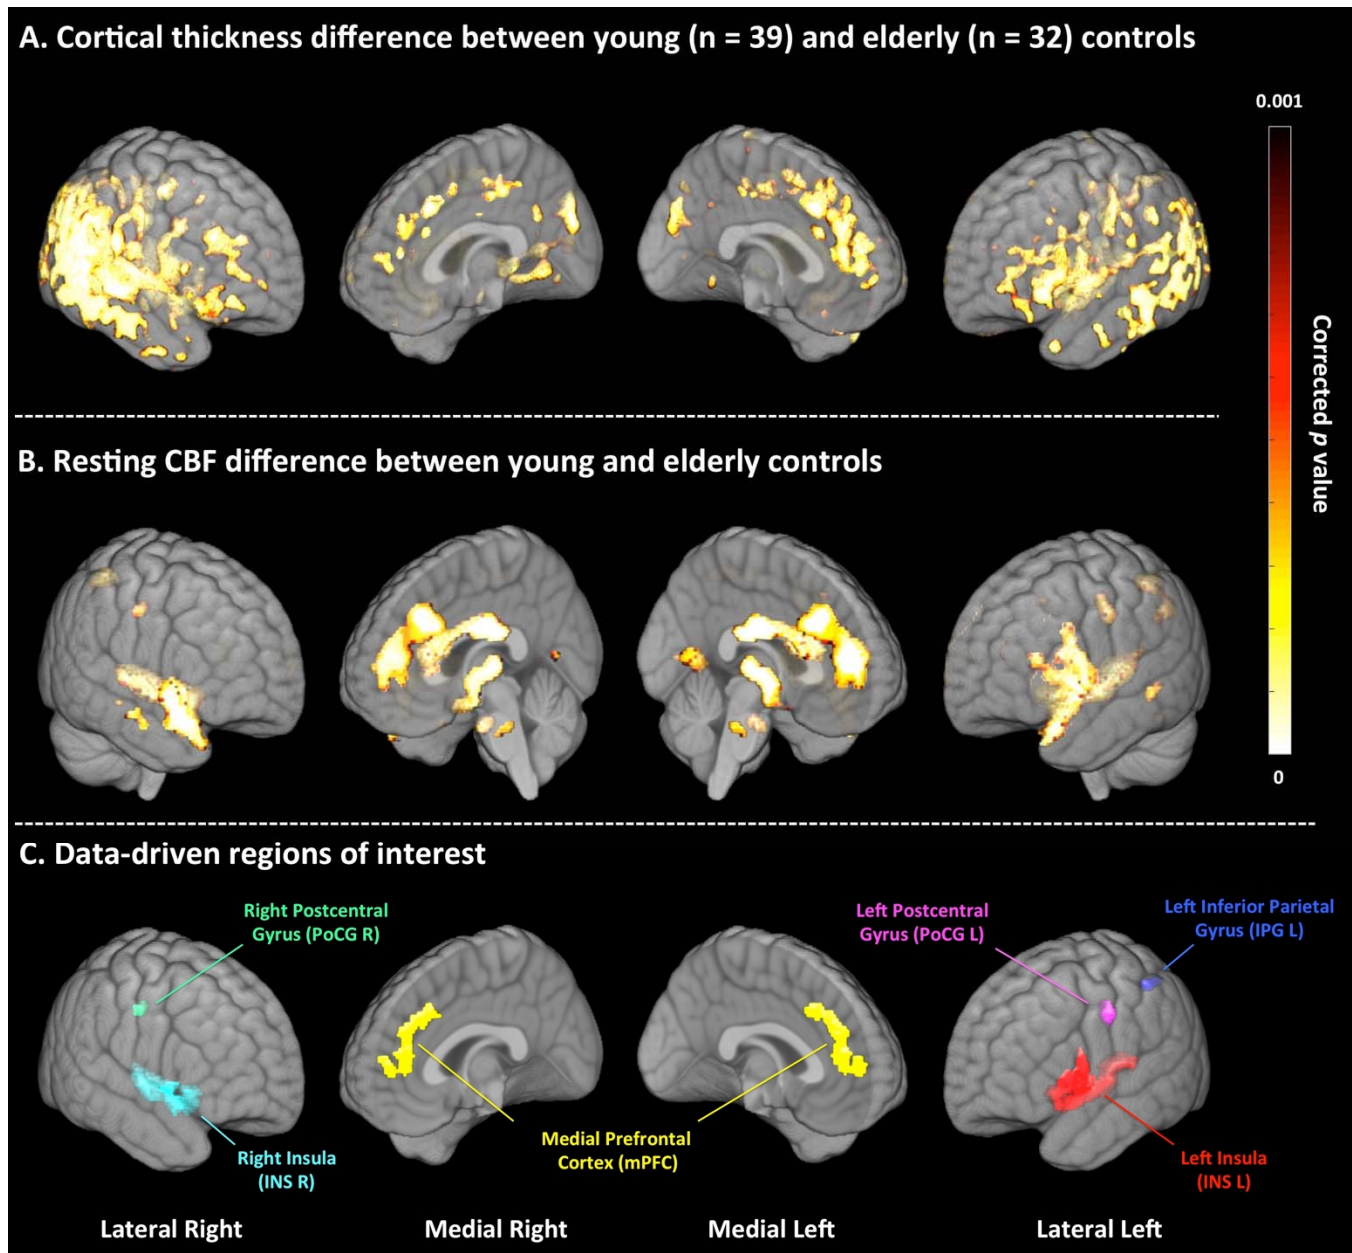

797

798 **Figure S2.** Statistical maps of cortical thickness (A) and resting CBF (B)  
799 differences between young and older subjects, tested by voxel-wise independent  
800 two-sample t-tests. Family-wise error rate was used to correct for multiple  
801 comparisons, with a significance level of corrected  $p \leq 0.001$ . Regions exhibiting

302 significant differences in both cortical thickness and resting CBF were defined as  
303 regions of interest in this study (C).

304 CBF = cerebral blood flow.

305

306

### 307 **C. Regional and global CBF and cortical thickness measurements of** 308 **TypcialAgers, SuperAgers and young control.**

309 Figure S3 shows the regional and global functional and structural measurements of  
310 TypicalAgers, SuperAgers and Young Controls. ANOVA post-hoc analyses were  
311 performed to test pairwise group differences. Qualitatively, there is a trend for all  
312 the measurements showing that CBF and cortical thickness of young controls is  
313 greater than that of SuperAgers, which is greater than that of TypicalAgers. All of  
314 the measurements are significantly different between TypicalAgers and young  
315 controls. SuperAgers and Young Controls differed on all measurements except  
316 whole-brain CBF during the PVT and at rest (indicated by the red circles in Figure  
317 S3). Group differences between SuperAgers and TypicalAgers are reported in the  
318 Results section of the manuscript.

319

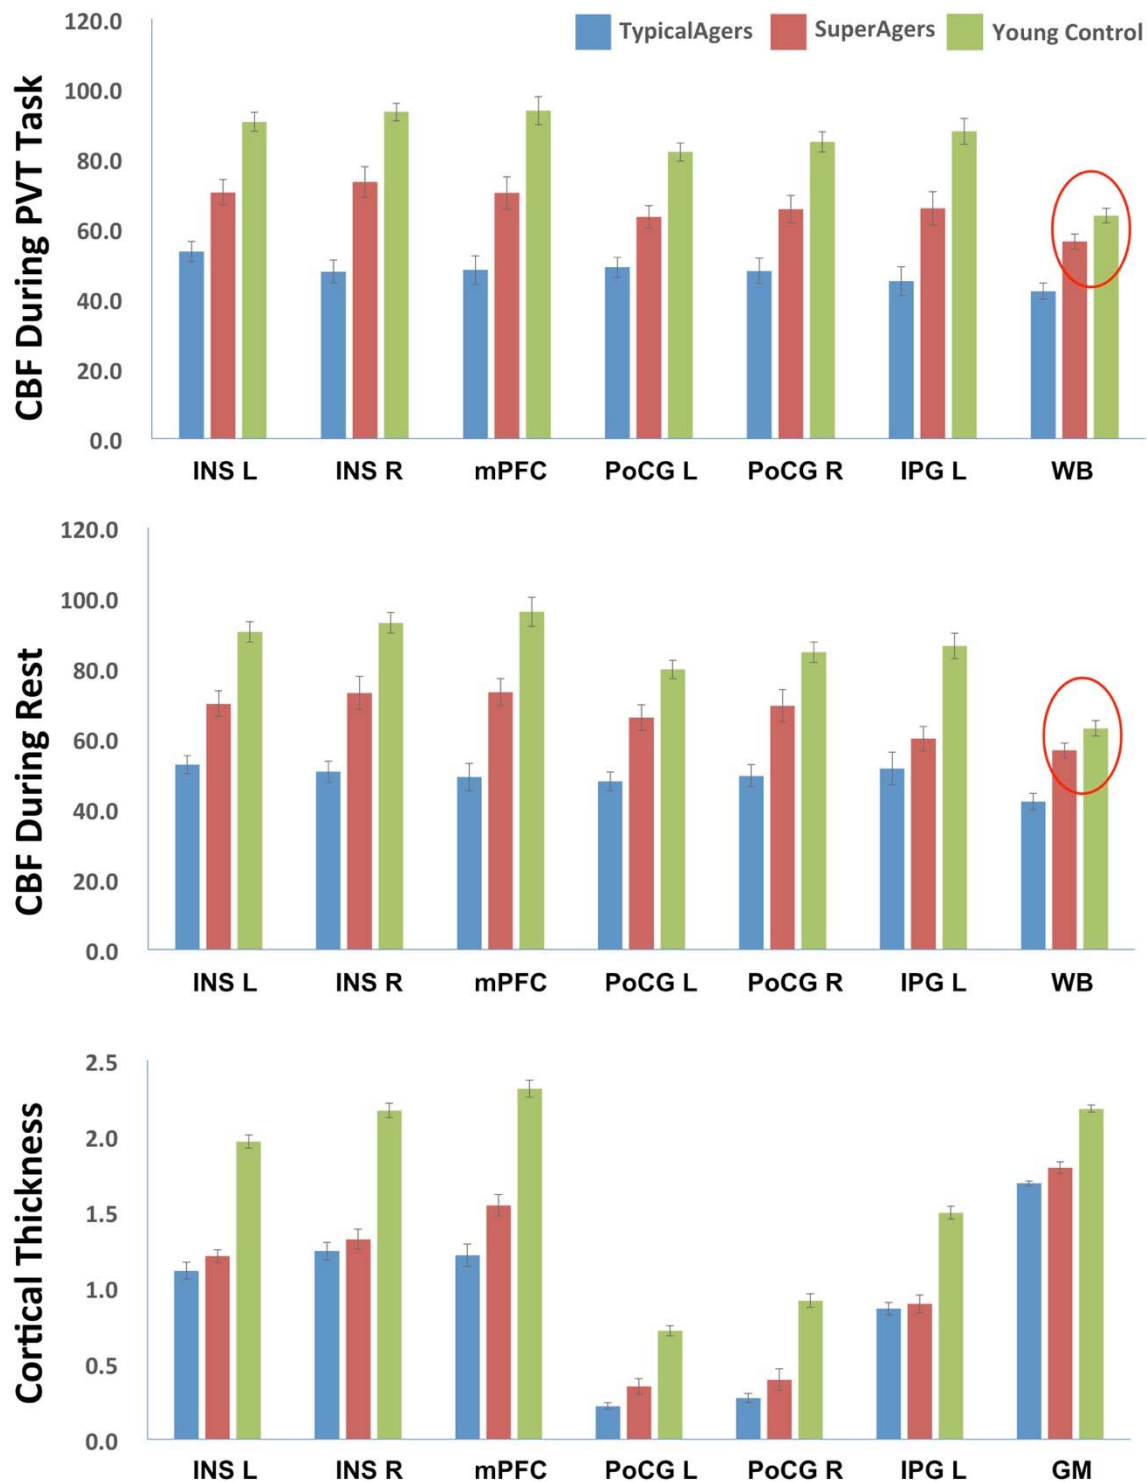

320

321 **Figure S3.** Regional and global cerebral blood flow (CBF) and cortical thickness  
 322 measurements of TypicalAgers, SuperAgers and young control. Red circles indicate  
 323 measurements that are not significantly different between Young Control and  
 324 SuperAgers after Bonferroni correction. INS = insula, mPFC = medial prefrontal  
 325 cortex, PoCG = postcentral gyrus, IPG = inferior parietal gyrus, WB = whole brain,  
 326 GM = gray matter, L = left, R = right.



327

328

## 329 **D. Voxel-wise partial correlation between resting/task CBF and** 330 **mean reaction time**

331 To investigate whether the significant correlation between global CBF and mean  
332 reaction time (RT) is driven by specific brain regions, voxel-wise partial correlation  
333 analyses were performed between resting and task CBF and mean RT on the PVT.  
334 A general linear model was fit with mean RT as the dependent variable and  
335 resting/task CBF as the independent variable, with age, sex and education as  
336 covariates. Threshold-free cluster enhancement (TFCE) (Smith & Nichols, 2009)  
337 available in the “randomize” package (Winkler et al., 2014) was used to enhance  
338 the statistical maps, which were then converted to voxel-wise corrected  $p$ -values by  
339 applying permutation testing with 10,000 iterations followed by family-wise error  
340 rate (FWE) correction. A significant level of corrected  $p = 0.05$  was used to identify  
341 areas with significant prediction value. The results, shown in Figure S4,  
342 demonstrate that resting and task CBF of all the brain regions was significantly  
343 correlated with mean RT such that greater CBF was associated with lower mean  
344 RT, indicative of faster processing speed. Thus, the significant correlation between  
345 global CBF and mean RT is likely a whole-brain effect rather than driven by  
346 specific brain regions.

347

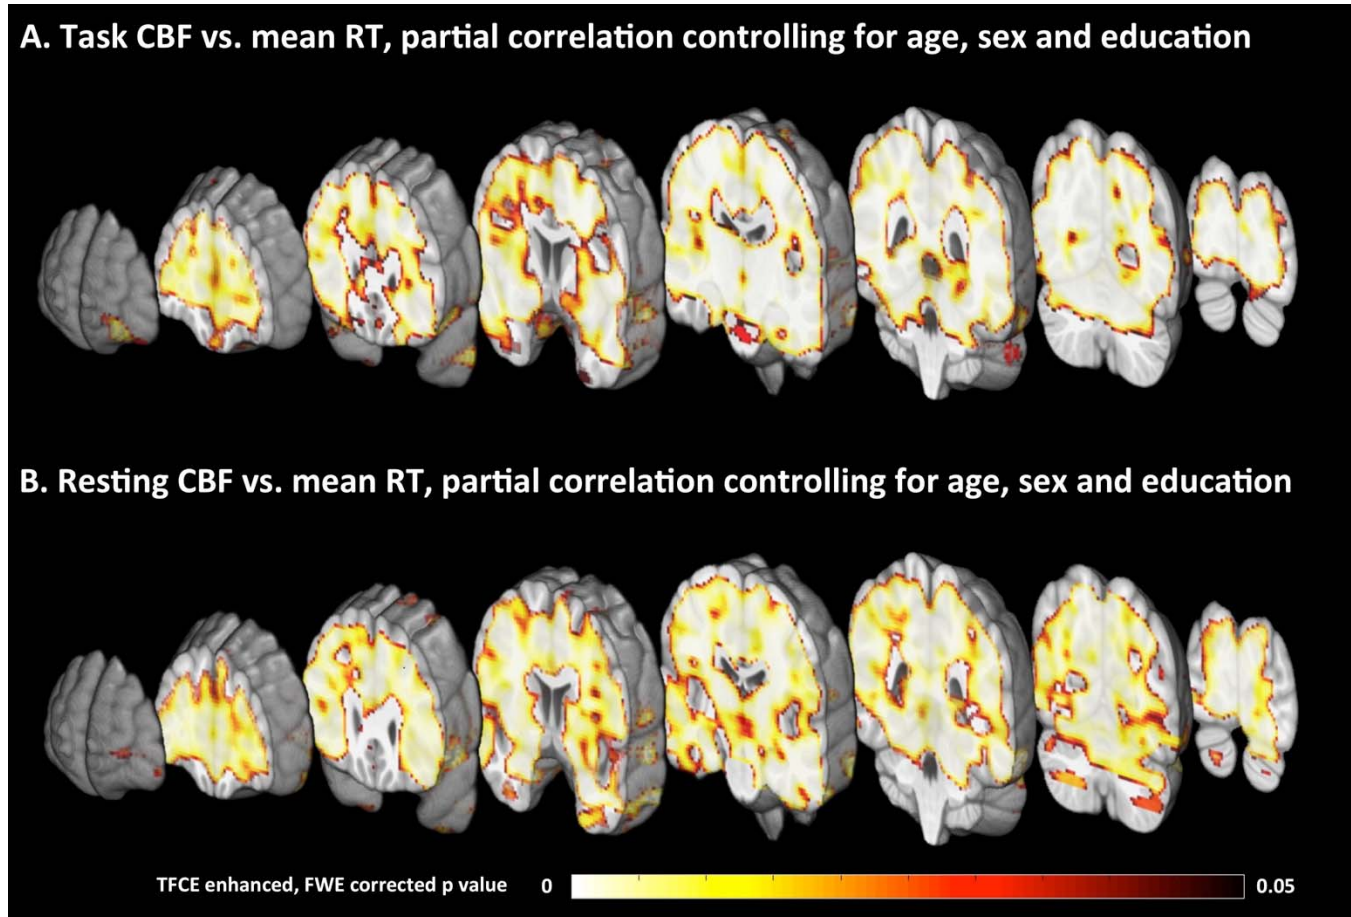

348

349

350

351

352

353

354

**Figure S4.** Statistical maps of voxel-wise partial correlation. between CBF during PVT task (A) and resting CBF and mean reaction time (RT), controlling for age, sex and education. TFCE = threshold-free cluster enhancement, FWE = family-wise error rate.
